# Supplementary material
Source: PubMed Central journal article supplement (PMC4410305)
Supplement: Supp_Figure1.pdf [file Supp_Figure1.pdf]

## Supplementary Data

|             |                                                                                                                                               |                                                                                                                                           |                    |                                                                                                                   |                                                                                          |                                                                                             |                                |
|-------------|-----------------------------------------------------------------------------------------------------------------------------------------------|-------------------------------------------------------------------------------------------------------------------------------------------|--------------------|-------------------------------------------------------------------------------------------------------------------|------------------------------------------------------------------------------------------|---------------------------------------------------------------------------------------------|--------------------------------|
| B. HXB2     | RPVSTQLLLNGSLAEEVIRSVNFTD                                                                                                                     | NAKIIIVQLNTSVEINCRPNNTRKRIRIQRGGRAFVTIG-KIGNMRQAHNCISRAKWNNTLQKIASKLREQFGNNKTIIFKQ                                                        | S                  | SGGDP                                                                                                             | ETVTHSFNCGEFFEYCNSTQLFNSTWFSNFWSTEGSNTE                                                  | 409                                                                                         |                                |
| B. JRC5F    | .....K.....D.....                                                                                                                             | .....E.....K.....S.....S.....H.....R.....Y.....T.....E.....I.....D.....I.....Q.....V.....E.....N.....V.....T.....H.....                   | .....K.....        | .....N.....                                                                                                       | .....ND.....                                                                             | .....K.....S.....G.....401                                                                  |                                |
| B. SS196.1  | .....E.....L.....T.....I.....                                                                                                                 | .....K.....V.....S.....H.....Y.....T.....E.....I.....D.....I.....K.....D.....Y.....E.....A.....Q.....I.....E.....R.....A.....N.....R..... | .....A.....        | .....A.....                                                                                                       | .....T.....N.....NG.....                                                                 | .....GWSDN.....E.....T.....399                                                              |                                |
| B. Bal.26   | .....E.....N.....I.....V.....                                                                                                                 | .....S.....H.....Y.....T.....E.....I.....D.....I.....L.....D.....N.....K.....V.....I.....                                                 | .....V.....        | .....H.....                                                                                                       | .....NV.....                                                                             | .....S.....E.....V.....406                                                                  |                                |
| B. YU2      | .....I.....E.....N.....                                                                                                                       | .....E.....V.....S.....N.....L.....Y.....T.....E.....I.....D.....I.....L.....K.....T.....Q.....E.....E.....I.....K.....                   | .....NP.....       | .....                                                                                                             | .....ND.....                                                                             | .....R.....K.....L.....G.....398                                                            |                                |
| A. KHH1209  | K.....KR.....K.....TE.....I.....N.....N.....                                                                                                  | .....FVNP.....S.....H.....Q.....Y.....T.....E.....I.....D.....I.....V.....SS.....K.....Q.....V.....K.....Q.....G.....T.....Y.....K.....   | .....V.....NT..... | .....                                                                                                             | .....T.....A.....DTSG.....                                                               | .....S.....N.....N.....WKES.....ST.....405                                                  |                                |
| B. MN       | .....E.....                                                                                                                                   | .....H.....E.....Q.....V.....Y.....K.....H.....                                                                                           | .....S.....        | .....Y.....T.....K.....N.....I.....T.....I.....                                                                   | .....D.....R.....V.....K.....K.....                                                      | .....V.....T.....M.....T.....SP.....                                                        | .....NG.....NNTW.....T.....408 |
| C. C54      | K.....V.....G.....II.....E.....L.....N.....V.....                                                                                             | .....H.....Q.....V.....G.....S.....                                                                                                       | .....              | .....Q.....T.....Y.....T.....E.....I.....D.....I.....E.....D.....                                                 | .....E.....Q.....R.....V.....S.....K.....A.....H.....Q.....K.....A.....S.....            | .....L.....V.....T.....R.....K.....T.....S.....G.....Y.....T.....P.....NGTKS.....SS.....407 |                                |
| C. SF162    | .....G.....E.....                                                                                                                             | .....K.....E.....S.....T.....                                                                                                             | .....              | .....Y.....T.....E.....I.....D.....I.....G.....E.....                                                             | .....V.....T.....Q.....A.....                                                            | .....V.....M.....N.....I.....P.....N.....401                                                |                                |
| B. PVO.4    | .....R.....I.....E.....N.....                                                                                                                 | .....KT.....S.....S.....                                                                                                                  | .....              | .....Y.....T.....E.....I.....D.....I.....L.....E.....K.....Y.....S.....T.....                                     | .....NG.....                                                                             | .....DAN.....GNCT.....CDES.....D.....419                                                    |                                |
| A. KHH1144  | K.....K.....K.....TE.....I.....N.....                                                                                                         | .....VEP.....R.....ESV.....                                                                                                               | .....              | .....Q.....F.....A.....T.....E.....I.....D.....I.....V.....S.....Q.....K.....Q.....V.....E.....Q.....H.....K..... | .....NS.....                                                                             | .....L.....T.....T.....S.....N.....TSMGSSNT.....412                                         |                                |
| B. CH505T/F | K.....G.....II.....E.....I.....N.....V.....                                                                                                   | .....H.....E.....K.....E.....K.....TS.....                                                                                                | .....              | .....Q.....Y.....T.....E.....I.....D.....I.....E.....Y.....NES.....E.....                                         | .....Q.....R.....V.....S.....K.....Y.....P.....H.....N.....T.....Q.....P.....            | .....L.....T.....T.....TSS.....R.....YMAN.....DMA.....S.....392                             |                                |
| C. X1936    | K.....K.....II.....E.....L.....N.....                                                                                                         | .....H.....E.....P.....I.....G.....SM.....                                                                                                | .....              | .....Q.....T.....F.....A.....T.....E.....I.....D.....I.....E.....S.....K.....                                     | .....Q.....R.....V.....S.....K.....H.....P.....K.....Q.....PP.....                       | .....L.....T.....TSK.....INS.....VMV.....D.....D.....410                                    |                                |
| B. HXB2     | GSD--TITLPCR                                                                                                                                  | IKQLINMQRVKGAMYAPPISGQIRCSSNITGLLLTRDGGN                                                                                                  | ---                | SNN--ESEIFR                                                                                                       | PGGGMDRDNWSELYKYKVKIEPLGVAPTAKARRVQREKRAVG-IGALFLGFLGAAGSTMGAASMTLVQARQLLSGIVQQQNLLRAIEA | 561                                                                                         |                                |
| B. JRC5F    | .N--I.I.                                                                                                                                      | .....E.....K.....K.....                                                                                                                   | ---                | NES--I.                                                                                                           | .....K.....                                                                              | .....553                                                                                    |                                |
| B. SS196.1  | .NG--                                                                                                                                         | .....V.....L.....E.....R.....L.....                                                                                                       | ---                | N-TTT                                                                                                             | .....GTQT.....R.....R.....R.....A.....L.....                                             | .....554                                                                                    |                                |
| B. Bal.26   | ENN--                                                                                                                                         | .....E.....R.....R.....                                                                                                                   | ---                | P-EDD                                                                                                             | ---KT.V.....VL.....L.....                                                                | .....558                                                                                    |                                |
| B. YU2      | RN---                                                                                                                                         | .....R.....                                                                                                                               | ---                | K-DT                                                                                                              | ---GT.....I.....                                                                         | .....558                                                                                    |                                |
| A. KHH1209  | .N-D..L.                                                                                                                                      | .....RT.Q.....P.L.S.K.....II.                                                                                                             | ---                | G-N.T                                                                                                             | ---T.....R.....Q.....R.....R.....                                                        | .....V.....I.....S.....548                                                                  |                                |
| B. MN       | .N-NN..Q.K.                                                                                                                                   | .....R.....                                                                                                                               | ---                | KD-TDT                                                                                                            | ---DT.....A.....V.....L.....                                                             | .....S.....562                                                                              |                                |
| C. C54      | ---SI..I.                                                                                                                                     | .....E.....R.....E.N.T.K.....V.                                                                                                           | ---                | G-TEP                                                                                                             | ---DT.T.....N.....E.K.....T.....M.E.....                                                 | .....V.....V.....I.....S.....T.....557                                                      |                                |
| C. SF162    | .....R.....E.....                                                                                                                             | .....K.....E.....IS                                                                                                                       | ---                | TT.....T-L.M.                                                                                                     | .....R.L.....                                                                            | .....552                                                                                    |                                |
| B. PVO.4    | .NN--                                                                                                                                         | .....V.....E.....K.L.K.T.....                                                                                                             | ---                | AN-NT                                                                                                             | ---T.....Q.....I.....R.....R.....                                                        | .....TL.M.....V.....K.....571                                                               |                                |
| A. KHH1144  | ETN-D..Q.                                                                                                                                     | .....RT.Q.I.....Q.V.....E.                                                                                                                | ---                | EEKN.T                                                                                                            | ---T.....R.....R.....G.....                                                              | .....I.....I.....S.....566                                                                  |                                |
| B. CH505T/F | TNSTR..IH.                                                                                                                                    | .....E.....R.....A.N.T.I.                                                                                                                 | ---                | GK-NT                                                                                                             | ---T.....N.K.....EVK.....N.R.....E.....                                                  | .....M.V.....I.....S.....K.....544                                                          |                                |
| C. X1936    | N--S.                                                                                                                                         | .....G.....R.....A.N.T.N.S.....I.                                                                                                         | ---                | IG-NGTD                                                                                                           | ---KT.....A.....E.K.....I.....E.....                                                     | .....V.....V.....S.....562                                                                  |                                |
| B. HXB2     | QQHLLQLTVWGIKQLQARILAVERYLKDDQLLGIWCGSKGLICTTAVPWNASWNSKLEQIVNHTTWMEWDREINNYTSLIHSLEESQNKQEKNEQELLEDKWASLWNFNITNWLWYIKLFIMIVGGLVGLRIVFAVLSIVN |                                                                                                                                           |                    |                                                                                                                   |                                                                                          | 706                                                                                         |                                |
| B. JRC5F    | .....M.....V.....M.....T.....DS..NM.....EK..E.....NT.YT.....I.....E.K.....I.....I.....K.....S.....                                            |                                                                                                                                           |                    |                                                                                                                   |                                                                                          | 698                                                                                         |                                |
| B. SS196.1  | .....V.....L.....R.....S.....T.....YKE.ENM..IQ.E..D..GI.YE.....EN..S.....I.....V.....S.....K.....                                             |                                                                                                                                           |                    |                                                                                                                   |                                                                                          | 699                                                                                         |                                |
| B. Bal.26   | .....V.....R.....NK.DNM.....I.Y.....D.K.....I.....I.....S.....                                                                                |                                                                                                                                           |                    |                                                                                                                   |                                                                                          | 703                                                                                         |                                |
| B. YU2      | .....V.....R.....T.....T.....NE.DNM..K.E..D..HI.Y..Q.....A.....D.K.....I.....I.....V.....                                                     |                                                                                                                                           |                    |                                                                                                                   |                                                                                          | 693                                                                                         |                                |
| A. KHH1209  | .....K.....V.....R.....N.....S.....YND.DNM..LQ.K..H..Q..YN.....D.A.....N.....H.....I.....V.....I.....I.....                                   |                                                                                                                                           |                    |                                                                                                                   |                                                                                          | 703                                                                                         |                                |
| B. MN       | .....M.....V.....F.....R.....T.....DD..NM..Q.E..D..Y..L.K..T.....D.H.....I.....V.....I.....I.....                                             |                                                                                                                                           |                    |                                                                                                                   |                                                                                          | 707                                                                                         |                                |
| C. C54      | .....T.V.I.....S.....QKE.DNM..Q.K..S..NT.YR.L.....R.KD.A..S.KN..S..D.....I.....I.....I.....I.....                                             |                                                                                                                                           |                    |                                                                                                                   |                                                                                          | 702                                                                                         |                                |
| C. SF162    | .....V.....D.....D.....NM.....E.....D.....N.....YT.....D.SK.....I.....I.....T.....                                                            |                                                                                                                                           |                    |                                                                                                                   |                                                                                          | 697                                                                                         |                                |
| B. PVO.4    | .....M.....V.....I.....T.....FNK.DNM.....E.....D.....G..YN.L.....D.A.....E.....S.K.....I.....I.....I.....                                     |                                                                                                                                           |                    |                                                                                                                   |                                                                                          | 716                                                                                         |                                |
| A. KHH1144  | .....M.K.....V.....R.....N.....S.....QDE..NM..LQ.K..S..N..Y.....D.A.G..N..T..D.S.....RI.....I.....AVIK                                        |                                                                                                                                           |                    |                                                                                                                   |                                                                                          | 711                                                                                         |                                |
| B. CH505T/F | .....M.K.....V.....L.....M.....N.Y..S.....TYGD..DNM..Q.E..S..EI.YE.L.....D.A..R.N.....I.....I.....I.....L.....                                |                                                                                                                                           |                    |                                                                                                                   |                                                                                          | 689                                                                                         |                                |
| C. X1936    | .....M.....T.V.I.....L.....I.....TYNE.DNM..Q.....DT.YR.L.Q.....Q.KD.A..S.KN.....D.....I.....I.....A.....                                      |                                                                                                                                           |                    |                                                                                                                   |                                                                                          | 707                                                                                         |                                |

MPER

**SUPPLEMENTARY FIG. S1.** HIV envelope alignment. Amino acid sequence alignment of outerdomain of HIV-1 envelopes. Membrane external proximal region (MPER) is noted; CAP205-CH12 MAb sensitive MPER residues<sup>(19)</sup> are highlighted in yellow. CD4 contact sites and CD4 binding loop are highlighted in orange. Red lines indicate CH103 MAb and CH505 T/F contact residues.
